# Supplementary material for: 14-3-3 Proteins and Other Candidates form Protein-Protein Interactions with the Cytosolic C-terminal End of SOS1 Affecting Its Transport Activity
Source: MDPI journal article supplement (doi:10.3390/ijms21093334), 2020-05-08
Supplement: s1 [file s1]

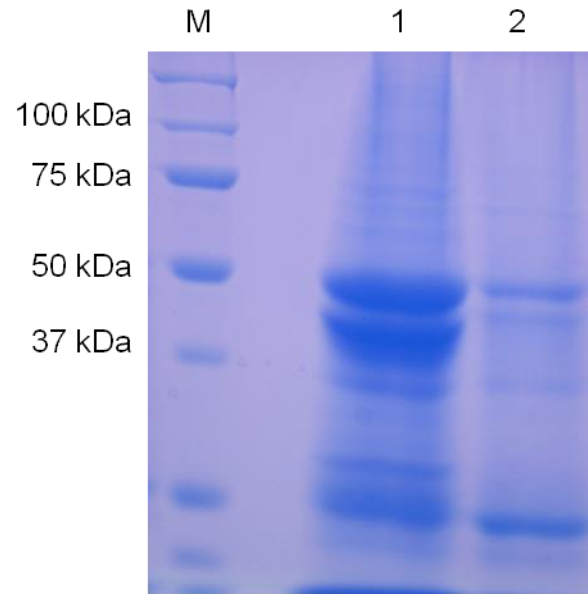

**Suppl. Figure S1. Eluates from the Affi-Gel10 affinity media columns.** SDS-PAGE of the SDS-Eluates taken from the Affi-Gel10 columns, loaded with either GST alone (2; control) or the SOS1-C-term (aa978-1146) GST-fusion protein (1). Slices of the entire lane were used for mass-spectrometric analyses of bound interaction partners.

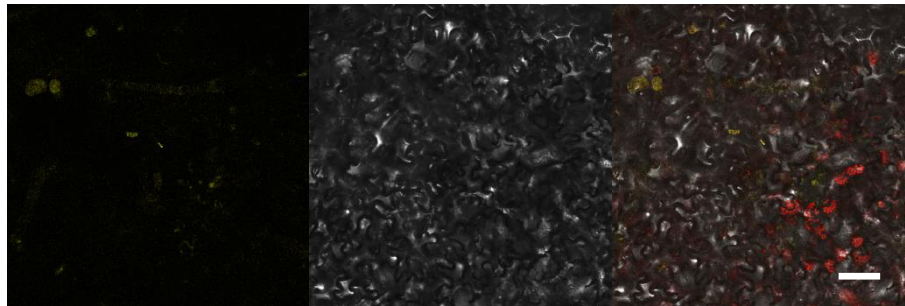

**Suppl. Figure S2. Negative control of Bimolecular Fluorescence Complementation analysis in *N. benthamiana*.** Plasmids containing the generated *sos1Cterm::yfp<sup>NT</sup>* and *vik1::yfp<sup>CT</sup>* constructs were transiently co-transformed into *N. benthamiana* leaves using *A. tumefaciens* mediated transformation. Left image: YFP fluorescence, middle image: transmitted light and right image: merge of YFP fluorescence, chlorophyll fluorescence and transmitted light. The YFP fluorescence signal was detected using a Leica TCS SP5II confocal laser scanning microscope system. Bar = 100  $\mu$ m.

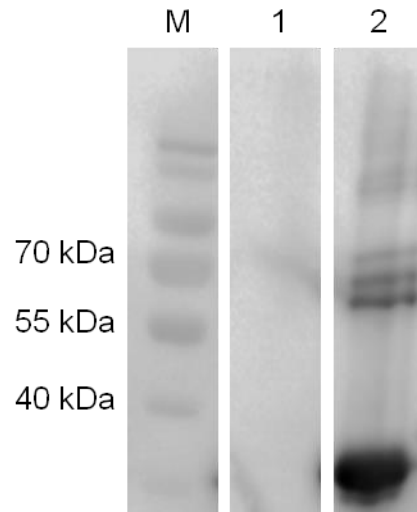

**Suppl. Figure S3. Expression and purification of the recombinant *At14-3-3 $\omega$* .** Western Blot of purified *At14-3-3 $\omega$* . Nickel-Sepharose chromatography was performed using a (10x) His-tag fusion protein. 1, total proteins from *At14-3-3 $\omega$*  expressing *Escherichia coli* cells; 2, purified eluate. The molecular mass (kDa) of the marker proteins is indicated.

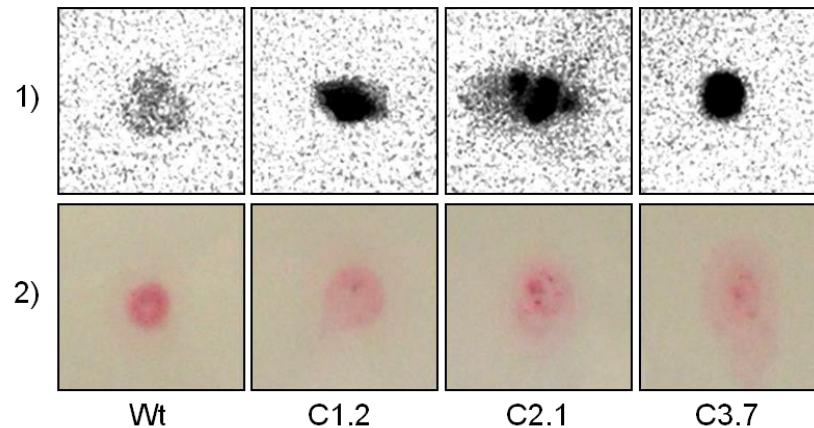

**Suppl. Figure S4. Protein levels of *SOS1 C-terminus*.** Dot-blot analyses was performed to detect recombinant Strep-tagged *SOS1 C-terminus* protein in *p35s::SOS1<sup>c-term</sup>StreplI* plants, using salt-stressed *Arabidopsis* root tissues. After acetone precipitation, supernatants of ground root material were dropped onto a nitrocellulose membrane. Immuno-detection was carried out with a monoclonal anti-Strep-Tag® antibody (1). As a loading control, the blot was stained with Ponceau S solution prior to immunoprinting (2).

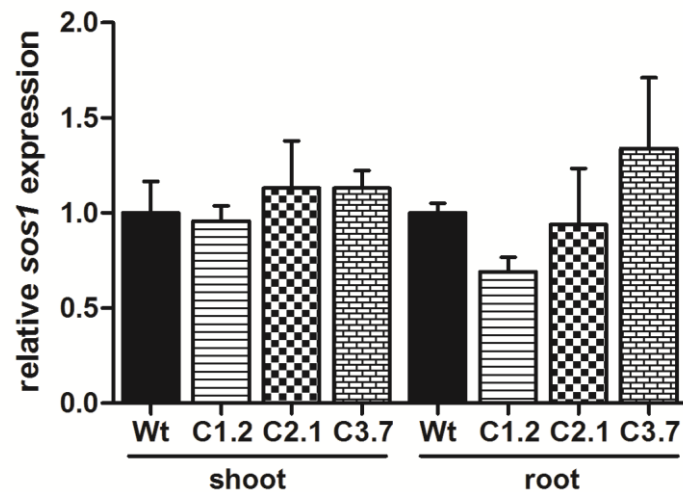

**Suppl. Figure S5. Relative expression levels of *SOS1-N-terminus*, revealed by quantitative RT-PCR.** Relative transcript levels of endogenous *SOS1 N-terminus* in Arabidopsis root tissues under salt stress conditions. Arabidopsis plants were grown in hydroponic culture for five weeks and watered for three days with 150 mM NaCl. Data represent means, +/- SE, of six independent biological replicates. Data normalized to housekeeping gene *pp2a* (*At1g13320*).

**Table S1.** Putative interaction partners of the recombinant *AtSOS1*-Cterminus protein under control conditions identified by mass-spectrometry.

| Gene number | Predicted protein function                                                                                                                                                                                                                                                                                                                                                                      |
|-------------|-------------------------------------------------------------------------------------------------------------------------------------------------------------------------------------------------------------------------------------------------------------------------------------------------------------------------------------------------------------------------------------------------|
| AT3G23810   | SAHH2 (Adenosylhomocysteinase 2); Protein is involved in a subpathway that synthesizes L-homocysteine from S-adenosyl-L-homocysteine, decreased activity might increase drought tolerance (Li et al. 2015, Front. Plant Sci 6: 717)                                                                                                                                                             |
| AT4G20890   | TUBB9 (Tubulin beta-9 chain); Structural constituent of cytoskeleton, functions in microtubule-based process                                                                                                                                                                                                                                                                                    |
| AT5G62690   | TUBB 2 (Tubulin beta-2 chain); Structural constituent of cytoskeleton, functions in microtubule-based process                                                                                                                                                                                                                                                                                   |
| AT5G19770   | TUBA3 (Tubulin alpha-3 chain); Structural constituent of cytoskeleton, functions in microtubule-based process                                                                                                                                                                                                                                                                                   |
| AT1G20010   | TUBB5 (Tubulin beta-5 chain); Structural constituent of cytoskeleton, functions in microtubule-based process                                                                                                                                                                                                                                                                                    |
| AT1G78300.1 | <b>14-3-3-like protein G-Box Factor 14 omega</b> , General Regulatory Factor 2, involved in brassinosteroid mediated signaling pathway, located in Golgi apparatus, cytoplasm, cytosol, plasma membrane, vacuolar membrane, vacuole, functions in protein phosphorylated amino acid binding                                                                                                     |
| AT1G35160.2 | 14-3-3-like protein GF14 phi, General Regulatory Factor 4, involved in brassinosteroid mediated signaling pathway, located in Golgi apparatus, cytoplasm, cytosol, nuclear envelope, nucleus, plasma membrane, functions in protein phosphorylated amino acid binding                                                                                                                           |
| AT2G36530   | ENO2 (Bifunctional enolase 2/transcriptional activator); Multifunctional enzyme that acts as an enolase involved in the metabolism and as a positive regulator of cold-responsive gene transcription, involved in a subpathway that synthesizes pyruvate from D-glyceraldehyde 3-phosphate. This subpathway is part of the pathway glycolysis, which is itself part of Carbohydrate degradation |
| AT3G55610   | Delta-1-pyrroline-5-carboxylate synthase P5CS plays a key role in proline biosynthesis, leading to osmoregulation in plants (Hmida-Sayari et al. 2005 Plant Sci. 169: 746-752)                                                                                                                                                                                                                  |
| AT5G65430.3 | <b>14-3-3-like protein GF14 kappa</b> , General Regulatory Factor 8, involved in brassinosteroid mediated signalling pathway, located in chloroplast, cytoplasm, nucleus, plant-type cell wall, plasma membrane, functions in protein phosphorylated amino acid binding                                                                                                                         |
| AT1G02500   | SAM1 (S-adenosylmethionine synthase 1); Catalyzes the formation of S-adenosyl-methionine from methionine and ATP. This protein is involved in a subpathway that synthesizes S-adenosyl-L-methionine from L-methionine. This subpathway is part of the pathway S-adenosyl-L-methionine biosynthesis, which is itself part of Amino-acid biosynthesis                                             |
| AT5G16050   | <b>14-3-3-like protein GF14 epsilon</b> , General Regulatory Factor 5, involved in the response to cadmium ion, located in Golgi apparatus, cell wall, chloroplast, stroma, cytoplasm, cytosol, mitochondrion, nuclear envelope, plasma membrane, involved in brassinosteroid mediated signaling pathway, functions in protein phosphorylated amino acid binding                                |
| AT3G02520.1 | 14-3-3-like protein GF14 nu, General Regulatory Factor 7, involved in brassinosteroid mediated signaling pathway, functions in protein phosphorylated amino acid binding                                                                                                                                                                                                                        |
| ATMG01190   | ATPA (ATP synthase subunit alpha, mitochondrial); Functions in ATP hydrolysis coupled proton transport                                                                                                                                                                                                                                                                                          |

|                    |                                                                                                                                                                                                                                                                                                                                                                                                 |
|--------------------|-------------------------------------------------------------------------------------------------------------------------------------------------------------------------------------------------------------------------------------------------------------------------------------------------------------------------------------------------------------------------------------------------|
| AT2G16950          | TRN1 (Transportin-1); Functions in intracellular protein transport, nuclear protein import as nuclear transport receptor                                                                                                                                                                                                                                                                        |
| <b>Gene number</b> | <b>Predicted protein function</b>                                                                                                                                                                                                                                                                                                                                                               |
| AT2G36880          | METK3 (S-adenosylmethionine synthase 3); Protein is involved in a subpathway that synthesizes S-adenosyl-L-methionine from L-methionine. This subpathway is part of the pathway S-adenosyl-L-methionine biosynthesis, which is itself part of Amino-acid biosynthesis                                                                                                                           |
| AT5G35360          | CAC2 (Biotin carboxylase, chloroplastic); Protein is involved in a subpathway that synthesizes malonyl-CoA from acetyl-CoA                                                                                                                                                                                                                                                                      |
| AT1G12840          | VHA-C (V-type proton ATPase subunit C); Subunit of the peripheral V1 complex of vacuolar ATPase. Subunit C is necessary for the assembly of the catalytic sector of the enzyme and is likely to have a specific function in its catalytic activity. V-ATPase is responsible for acidifying a variety of intracellular compartments in eukaryotic cells. ATP hydrolysis coupled proton transport |
| AT1G76550          | PFP-alpha2 (Pyrophosphate--fructose 6-phosphate 1-phosphotransferase subunit alpha 2); Protein is involved in a subpathway that synthesizes D-glyceraldehyde 3-phosphate and glycerone phosphate from D-glucose This subpathway is part of the pathway glycolysis, which is itself part of Carbohydrate degradation                                                                             |
| AT1G22300.1        | 14-3-3-like protein GF14 epsilon, General Regulatory Factor 10, involved in the response to ABA, located in chloroplast, stroma, cytoplasm, cytosol, mitochondrion, plasma membrane, plasmodesma, involved in brassinosteroid mediated signaling pathway, functions in protein phosphorylated amino acid binding                                                                                |
| AT2G05710          | ACO2 (Aconitate hydratase 2, mitochondrial); Protein is involved in a subpathway that synthesizes isocitrate from oxaloacetate. This subpathway is part of the pathway tricarboxylic acid cycle, which is itself part of Carbohydrate metabolism                                                                                                                                                |
| AT5G15450          | CLPB3 (Chaperone protein, chloroplastic); Molecular chaperone essential for chloroplast development and seedling viability                                                                                                                                                                                                                                                                      |
| AT1G53240          | MDH1 (Malate dehydrogenase 1, mitochondrial)                                                                                                                                                                                                                                                                                                                                                    |
| AT1G09795          | ATP phosphoribosyltransferase 2, chloroplastic; Protein is involved in a subpathway that synthesizes L-histidine from 5-phospho-alpha-D-ribose 1-diphosphate. This subpathway is part of the pathway L-histidine biosynthesis, which is itself part of Amino-acid biosynthesis                                                                                                                  |
| AT5G08280          | Porphobilinogen deaminase, chloroplastic; Protein is involved in a subpathway that synthesizes coproporphyrinogen-III from 5-aminolevulinate. This subpathway is part of the pathway protoporphyrin-IX biosynthesis, which is itself part of Porphyrin-containing compound metabolism                                                                                                           |
| AT1G18500          | IPMS1 (2-isopropylmalate synthase 1, chloroplastic); Protein is involved in a subpathway that synthesizes L-leucine from 3-methyl-2-oxobutanoate. This subpathway is part of the pathway L-leucine biosynthesis, which is itself part of Amino-acid biosynthesis                                                                                                                                |
| AT2G42590.3        | 14-3-3-like protein GF14 mu, General Regulatory Factor 9, involved in post-embryonic root development, located in chloroplast, stroma, cytoplasm, cytosol, nucleus, plasma membrane, functions in calcium ion binding, protein phosphorylated amino acid binding                                                                                                                                |
| AT2G25450          | GSL-OH (Probable 2-oxoacid dependent dioxygenase); 1-aminocyclopropane-1-carboxylate oxidase activity                                                                                                                                                                                                                                                                                           |
| AT2G45300          | 3-phosphoshikimate 1-carboxyvinyltransferase, chloroplastic; Protein is involved in a subpathway that synthesizes chorismate from D-erythrose 4-phosphate and phosphoenolpyruvate.                                                                                                                                                                                                              |
| AT2G20580          | RPN2A (26S proteasome non-ATPase regulatory subunit 2 homolog A); functions in ubiquitin binding                                                                                                                                                                                                                                                                                                |

|                    |                                                                                                                                                                                                                                                                                       |
|--------------------|---------------------------------------------------------------------------------------------------------------------------------------------------------------------------------------------------------------------------------------------------------------------------------------|
| AT1G32060          | Phosphoribulokinase, chloroplastic; Protein is involved in the pathway Calvin cycle, which is part of Carbohydrate biosynthesis                                                                                                                                                       |
| <b>Gene number</b> | <b>Predicted protein function</b>                                                                                                                                                                                                                                                     |
| AT3G20050          | CCT1 (T-complex protein 1 subunit alpha); molecular chaperone, functions in ATP binding                                                                                                                                                                                               |
| AT4G21210          | RP1 (Pyruvate, phosphate dikinase regulatory protein, chloroplastic); Bifunctional serine/threonine kinase and phosphorylase involved in the dark/light-mediated regulation of PPK by catalyzing its phosphorylation/dephosphorylation                                                |
| AT1G05010          | ACO4 (1-aminocyclopropane-1-carboxylate oxidase 4); Protein is involved in a subpathway that synthesizes ethylene from S-adenosyl-L-methionine. This subpathway is part of the pathway ethylene biosynthesis via S-adenosyl-L-methionine, which is itself part of Alkene biosynthesis |
| AT5G55280          | FtsZ1 (Cell division protein homolog 1, chloroplastic); Exhibits GTPase activity                                                                                                                                                                                                      |
| AT5G20630          | GER3 (Germin-like protein subfamily 3 member 3)                                                                                                                                                                                                                                       |
| AT3G14790          | RHM3 (Probable rhamnose biosynthetic enzyme 3); Involved in Carbohydrate biosynthesis                                                                                                                                                                                                 |
| AT5G17990          | PAT1 (Anthranilate phosphoribosyltransferase, chloroplastic); Protein is involved in a subpathway that synthesizes L-tryptophan from chorismate                                                                                                                                       |
| AT5G49460          | ACLB-2 (ATP-citrate synthase beta chain protein 2); Primary enzyme responsible for the synthesis of cytosolic acetyl-CoA, used for the elongation of fatty acids and biosynthesis of isoprenoids, flavonoids and malonated derivatives                                                |
| AT2G40490          | UPD2 (Uroporphyrinogen decarboxylase 2, chloroplastic); Protein is involved in a subpathway that synthesizes coproporphyrinogen-III from 5-aminolevulinic acid                                                                                                                        |
| AT1G06680          | OEE2 (Oxygen-evolving enhancer protein 2-1, chloroplastic); May be involved in the regulation of photosystem II                                                                                                                                                                       |
| AT1G17050          | SPS2 (Solanesyl diphosphate synthase 2, chloroplastic); Involved in isoprenoid biosynthetic pathway                                                                                                                                                                                   |
| AT2G30110          | UBA1 (Ubiquitin-activating enzyme E1-1); Involved in the pathway protein ubiquitination, which is part of Protein modification                                                                                                                                                        |
| AT4G23100          | GSH1 (Glutamate--cysteine ligase, chloroplastic); protein is involved in a subpathway that synthesizes glutathione from L-cysteine and L-glutamate                                                                                                                                    |
| AT1G57720          | Probable elongation factor 1-gamma 2, translation elongation factor activity                                                                                                                                                                                                          |
| AT1G64520          | RPN12A (26S proteasome non-ATPase regulatory subunit 8 homolog A); Acts as a regulatory subunit of the 26S proteasome which is involved in the ATP-dependent degradation of ubiquitinated protein                                                                                     |
| AT4G23460          | Beta-adaptin-like protein C; Subunit of clathrin-associated adaptor protein complex                                                                                                                                                                                                   |
| AT4G29120          | Probable 3-hydroxyisobutyrate dehydrogenase-like 1, mitochondrial; Protein is involved in the pathway L-valine degradation, which is part of Amino-acid degradation                                                                                                                   |
| AT1G76080          | CDSP32 (Thioredoxin-like protein, chloroplastic); Probable thiol-disulfide oxidoreductase involved in resistance to oxidative stress                                                                                                                                                  |
| AT5G01410          | PDX1.3 (Pyridoxal biosynthesis protein); Protein is involved in the pathway pyridoxal 5'-phosphate biosynthesis, which is part of Cofactor biosynthesis                                                                                                                               |
| AT5G58290          | RPT3 (26S protease regulatory subunit 6B homolog); Protein is involved in the ATP-dependent degradation of ubiquitinated protein                                                                                                                                                      |
| AT3G14390          | LYSA1 (Diaminopimelate decarboxylase 1, chloroplastic); Protein is involved in a subpathway that synthesizes L-lysine from DL-2,6-diaminopimelate. This                                                                                                                               |



|                    |                                                                                                                                                                                                                       |
|--------------------|-----------------------------------------------------------------------------------------------------------------------------------------------------------------------------------------------------------------------|
|                    | subpathway is part of the pathway L-lysine biosynthesis via DAP pathway, which is itself part of Amino-acid biosynthesis                                                                                              |
| <b>Gene number</b> | <b>Predicted protein function</b>                                                                                                                                                                                     |
| AT1G03630          | PORC (Protochlorophyllide reductase C, chloroplastic); Protein is involved in the pathway chlorophyll biosynthesis, which is part of Porphyrin-containing compound metabolism                                         |
| AT4G24450          | GWD2 (Alpha-glucan water dikinase 2); Mediates the incorporation of phosphate into alpha-glucan                                                                                                                       |
| AT1G12410          | CLPR2 (ATP-dependent protease proteolytic subunit-related protein 2, chloroplastic); Required for chloroplast development and integrity                                                                               |
| AT5G22800          | EMB86 (Probable alanine--tRNA ligase, chloroplastic); Catalyzes the attachment of alanine to tRNA(Ala)                                                                                                                |
| AT5G03940          | FFC (Signal recognition particle 54 kDa protein, chloroplastic); Involved in cotranslational and post-translational sorting of thylakoid proteins                                                                     |
| AT1G01470          | LEA14 (late embryogenesis abundant protein 14); Probable desiccation-related protein                                                                                                                                  |
| AT3G10920          | MSD1 (Superoxide dismutase [Mn] 1, mitochondrial); Destroys superoxide anion radicals                                                                                                                                 |
| AT5G45930          | CHL12 (Magnesium-chelatase subunit Chl1-2, chloroplastic); Protein is involved in the pathway chlorophyll biosynthesis, which is part of Porphyrin-containing compound metabolism.                                    |
| AT5G37830          | OXP1 (5-oxoprolinase); Acts in glutathione degradation pathway                                                                                                                                                        |
| AT3G19170          | PreP1 (Presequence protease 1, chloroplastic/mitochondrial); ATP-independent protease that degrades both mitochondrial and chloroplastic transit peptides after their cleavage                                        |
| AT5G62790          | DXR (1-deoxy-D-xylulose 5-phosphate reductoisomerase, chloroplastic); Protein is involved in step 1 of the subpathway that synthesizes isopentenyl diphosphate from 1-deoxy-D-xylulose 5-phosphate                    |
| AT4G33510          | DHS2 (Phospho-2-dehydro-3-deoxyheptonate aldolase 2, chloroplastic); Protein is involved in step 1 of the subpathway that synthesizes chorismate from D-erythrose 4-phosphate and phosphoenolpyruvate.                |
| AT4G31490          | Coatomer subunit beta-2; Coatomer complex is required for budding from Golgi membranes                                                                                                                                |
| AT1G79870          | HPR2 (Glyoxylate/hydroxypyruvate reductase A); Catalyzes the NADPH-dependent reduction of glyoxylate and hydroxypyruvate into glycolate and glycerate                                                                 |
| AT3G59970          | MTHFR1 (Methylenetetrahydrofolate reductase 1); Protein is involved in the pathway tetrahydrofolate interconversion, which is part of One-carbon metabolism                                                           |
| AT3G25800          | PP2AA2 (Serine/threonine-protein phosphatase 2A, 65 kDa regulatory subunit A beta isoform); Subunit serves a scaffolding molecule to coordinate the assembly of the catalytic domain and a variable regulatory domain |
| AT2G24270          | ALDH11A3 (NADP-dependent glyceraldehyde-3-phosphate dehydrogenase); Important as a means of generating NADPH for biosynthetic processes                                                                               |
| AT1G47128          | RD21a (Cysteine proteinase); Cysteine protease that plays a role in immunity, senescence, biotic and abiotic stresses                                                                                                 |
| AT2G46520          | CAS (Exportin-2); Mediates importin-alpha re-export from the nucleus to the cytoplasm                                                                                                                                 |
| AT1G80460          | GLPK (Glycerol kinase); Key enzyme in the regulation of glycerol uptake and metabolism                                                                                                                                |

|                        |                                                                                                                                                                                                                                                                                                    |
|------------------------|----------------------------------------------------------------------------------------------------------------------------------------------------------------------------------------------------------------------------------------------------------------------------------------------------|
| AT5G26570              | GWD3 (Phosphoglucan, water dikinase, chloroplastic); Mediates the incorporation of phosphate into phospho-alpha-glucan, mostly at the C3 position of the glucose unit, required for starch degradation                                                                                             |
| <b>Gene number</b>     | <b>Predicted protein function</b>                                                                                                                                                                                                                                                                  |
| AT5G28840              | GDP-mannose 3,5-epimerase; protein is involved in a subpathway that synthesizes L-ascorbate from GDP-alpha-D-mannose                                                                                                                                                                               |
| AT2G25080              | GPX1 (Phospholipid hydroperoxide glutathione peroxidase 1, chloroplastic); Protects cells and enzymes from oxidative damage by catalyzing the reduction of hydrogen peroxide                                                                                                                       |
| AT3G22890              | APS1 (ATP sulfurylase 1, chloroplastic); Protein is involved in a subpathway that synthesizes sulfite from sulfate                                                                                                                                                                                 |
| AT4G26900              | HISN4 (Imidazole glycerol phosphate synthase hisHF, chloroplastic); Protein is involved in a subpathway that synthesizes L-histidine from 5-phospho-alpha-D-ribose 1-diphosphate. This subpathway is part of the pathway L-histidine biosynthesis, which is itself part of Amino-acid biosynthesis |
| AT5G52920              | PKP2 (Plastidial pyruvate kinase 2); Required for plastidial pyruvate kinase activity                                                                                                                                                                                                              |
| AT3G14990              | DJ1A (Protein DJ-1 homolog A); Involved in oxidate stress response                                                                                                                                                                                                                                 |
| AT2G27530              | RPL10AB (60S ribosomal protein L10a-2)                                                                                                                                                                                                                                                             |
| AT1G02930              | GSTF6 (Glutathione S-transferase F6); May be involved in the conjugation of reduced glutathione to endogenous and exogenous hydrophobic electrophiles                                                                                                                                              |
| AT5G54160              | OMT1 (Flavone 3'-O-methyltransferase 1); Protein is involved in the pathway quercetin degradation, which is part of Flavonoid metabolism                                                                                                                                                           |
| AT2G35500              | SKL2 (Probable inactive shikimate kinase like 2, chloroplastic)                                                                                                                                                                                                                                    |
| AT5G40390              | RFS5 (Probable galactinol-sucrose galactosyltransferase 5); Transglucosidase operating by a ping-pong reaction mechanism                                                                                                                                                                           |
| AT2G29450              | GSTU5 (Glutathione S-transferase U5); May be involved in the conjugation of reduced glutathione to endogenous and exogenous hydrophobic electrophiles                                                                                                                                              |
| AT1G07320              | RPL4 (50S ribosomal protein L4, chloroplastic); Protein binds directly and specifically to 23S rRNA                                                                                                                                                                                                |
| ATCG00380              | rps4 (30S ribosomal protein S4, chloroplastic); One of the primary rRNA binding proteins                                                                                                                                                                                                           |
| AT5G36160              | TAT (Tyrosine aminotransferase); Protein is involved in step 2 of the subpathway that synthesizes acetoacetate and fumarate from L-phenylalanine. This subpathway is part of the pathway L-phenylalanine degradation, which is itself part of Amino-acid degradation                               |
| AT5G66570              | OEE1 (Oxygen-evolving enhancer protein 1-1, chloroplastic); Stabilizes the manganese cluster which is the primary site of water splitting                                                                                                                                                          |
| AT1G14030              | LSMT-L ([Fructose-bisphosphate aldolase]-lysine N-methyltransferase, chloroplastic); Protein-lysine methyltransferase methylating chloroplastic fructose 1,6-bisphosphate aldolases                                                                                                                |
| AT4G04040              | PFP-beta2 (Pyrophosphate--fructose 6-phosphate 1-phosphotransferase subunit beta 2); Catalyzes the phosphorylation of D-fructose 6-phosphate                                                                                                                                                       |
| ATCG00830<br>ATCG01310 | rpl2-A (50S ribosomal protein L2, chloroplastic); Structural constituent of ribosome                                                                                                                                                                                                               |
| AT1G58080              | ATP-PRTase 1 (ATP phosphoribosyltransferase 1, chloroplastic); Protein is involved in a subpathway that synthesizes L-histidine from 5-phospho-alpha-D-ribose 1-diphosphate                                                                                                                        |

|                    |                                                                                                                                                                           |
|--------------------|---------------------------------------------------------------------------------------------------------------------------------------------------------------------------|
| AT4G04020          | PAP1 (Probable plastid-lipid-associated protein 1, chloroplastic); Probably involved in light/cold stress-related jasmonate biosynthesis                                  |
| AT4G19710          | AKHSDH2 (Bifunctional aspartokinase/homoserine dehydrogenase 2, chloroplastic)                                                                                            |
| <b>Gene number</b> | <b>Predicted protein function</b>                                                                                                                                         |
| AT5G42740          | PGIC (Glucose-6-phosphate isomerase, cytosolic); Protein is involved in a subpathway that synthesizes D-glyceraldehyde 3-phosphate and glycerone phosphate from D-glucose |
| AT5G53460          | GLT1 (Glutamate synthase 1 [NADH], chloroplastic); Involved in glutamate biosynthesis                                                                                     |
| AT3G58140          | Phenylalanine--tRNA ligase, chloroplastic/mitochondrial; Is responsible for the charging of tRNA(Phe) with Phenylalanine in mitochondrial translation                     |
| AT1G17650          | GLYR2 (Glyoxylate/succinic semialdehyde reductase 2, chloroplastic); Catalyzes the NADPH-dependent reduction of glyoxylate to glycolate                                   |
| AT4G34490          | CAP1 (Cyclase-associated protein 1); Actin monomer binding protein                                                                                                        |
| AT1G68590          | 30S ribosomal protein 3-1, chloroplastic; probably a ribosomal protein                                                                                                    |
| AT1G24020          | MLP423 (MLP-like protein 423); Involved in response to biotic stimulus                                                                                                    |
| AT2G43090          | 3-isopropylmalate dehydratase small subunit 3; Plays an essential role in leucine biosynthesis                                                                            |
| AT2G19940          | Probable N-acetyl-gamma-glutamyl-phosphate reductase, chloroplastic                                                                                                       |
| AT3G58500          | PP2A3 (Serine/threonine-protein phosphatase PP2A-3 catalytic subunit); Phosphoprotein phosphatase activity                                                                |
| AT2G20890          | THF1 (Protein THYLAKOID FORMATION 1, chloroplastic); Involved in the process of vesicle-mediated thylakoid membrane biogenesis                                            |
| AT1G47340          | F-box protein                                                                                                                                                             |
| AT3G19980          | FYPP3 (Phytochrome-associated serine/threonine-protein phosphatase 3); Dephosphorylates phosphorylated phytochromes                                                       |
| AT5G48300          | APS1 (Glucose-1-phosphate adenylyltransferase small subunit, chloroplastic); Protein plays a role in synthesis of starch                                                  |
| AT5G65620          | OOP (Organellar oligopeptidase A, chloroplastic/mitochondrial); Protein plays a role in the degradation of transit peptides                                               |
| AT3G04880          | DRT102 (DNA-damage-repair/tolerant protein); Involved in response to cold                                                                                                 |
| AT2G43910          | HOL1 (Thiocyanate methyltransferase 1); Involved in glucosinolate metabolism                                                                                              |
| AT5G27470          | Serine--tRNA ligase; Catalyzes the attachment of serine to tRNA(Ser)                                                                                                      |
| AT3G29360          | UGD2 (UDP-glucose 6-dehydrogenase 2); Protein is involved in a subpathway that synthesizes UDP-alpha-D-glucuronate from UDP-alpha-D-glucose                               |
| AT3G54900          | GRXS14 (Monothiol glutaredoxin-S14, chloroplastic); Probably involved in the regulation of the redox state of proteins                                                    |
| AT2G17790          | VPS35A (Vacuolar protein sorting-associated protein 35A); Protein plays a role in vesicular protein sorting                                                               |
| AT3G10670          | ABC16 (ABC transporter I family member 6, chloroplastic); ATPase activity coupled to transmembrane transport of substances                                                |

|                    |                                                                                                                                                                                                                              |
|--------------------|------------------------------------------------------------------------------------------------------------------------------------------------------------------------------------------------------------------------------|
| AT4G24820          | RPN7 (26S proteasome non-ATPase regulatory subunit 6 homolog); Acts as a regulatory subunit of the 26S proteasome which is involved in the ATP-dependent degradation of ubiquitinated proteins                               |
| AT5G05780          | RPN8A (26S proteasome non-ATPase regulatory subunit 7 homolog A); Acts as a regulatory subunit of the 26S proteasome which is involved in the ATP-dependent degradation of ubiquitinated proteins                            |
| <b>Gene number</b> | <b>Predicted protein function</b>                                                                                                                                                                                            |
| AT3G54640          | TSA1 (Tryptophan synthase alpha chain, chloroplastic); Protein is involved in step 5 of the subpathway that synthesizes L-tryptophan from chorismate                                                                         |
| AT3G13330          | PA200 (Proteasome activator subunit 4); Component of the proteasome                                                                                                                                                          |
| AT2G47390          | GEP (Probable glutamyl endopeptidase, chloroplastic); Serine-type protease                                                                                                                                                   |
| AT1G36160          | ACC1 (Acetyl-CoA carboxylase 1); Protein is involved in a subpathway that synthesizes malonyl-CoA from acetyl-CoA. This subpathway is part of the pathway malonyl-CoA biosynthesis, which is itself part of Lipid metabolism |
| AT1G16460          | RDH2 (Thiosulfate/3-mercaptopyruvate sulfurtransferase 2); Catalyzes the transfer from a sulfur ion to cyanide or another thiol compound                                                                                     |
| AT5G59880          | ADF3 (Actin-depolymerizing factor 3); Actin-depolymerizing protein                                                                                                                                                           |
| AT5G47200          | RABD2b (Ras-related protein); Regulator of membrane traffic from the Golgi apparatus towards the ER                                                                                                                          |
| AT3G53580          | DAPF (Diaminopimelate epimerase, chloroplastic); Protein is involved in a subpathway that synthesizes DL-2,6-diaminopimelate from LL-2,6-diaminopimelate                                                                     |
| AT4G13430          | III1 (3-isopropylmalate dehydratase large subunit); Protein is involved in a subpathway that synthesizes L-leucine from 3-methyl-2-oxobutanoate                                                                              |
| AT3G02360          | 6-phosphogluconate dehydrogenase, decarboxylating 3; Protein is involved in a subpathway that synthesizes D-ribulose 5-phosphate from D-glucose 6-phosphate                                                                  |
| AT3G28300          | UPF0496 protein; Integral component of membrane                                                                                                                                                                              |
| AT3G48990          | 4CL8 (4-coumarate--CoA ligase-isomerase 8); Required for oxalate degradation                                                                                                                                                 |
| AT4G12060          | Clp protease-related protein, chloroplastic; Protein histidine kinase binding                                                                                                                                                |
| AT5G64050          | GluRS (Glutamate--tRNA ligase, chloroplastic/mitochondrial); Catalyzes the attachment of glutamate to tRNA(Glu)                                                                                                              |
| AT1G80380          | GLYK (D-glycerate 3-kinase, chloroplastic); Protein is involved in a subpathway that synthesizes 3-phospho-D-glycerate from glycine                                                                                          |
| AT5G22580          | Stress-response A/B barrel domain-containing protein; Involved in stress response                                                                                                                                            |
| AT3G43300          | BIG5 (Brefeldin A-inhibited guanine nucleotide-exchange protein 5); Plays a role in vesicular protein sorting                                                                                                                |
| AT1G72550          | Probable phenylalanine-tRNA ligase beta subunit; Phenylalanine tRNA ligase activity                                                                                                                                          |
| AT3G63170          | FAP1 (Fatty-acid-binding protein 1)                                                                                                                                                                                          |
| AT1G30530          | UGT78D1 (UDP-glycosyltransferase 78D1); UDP-glycosyltransferase activity                                                                                                                                                     |
| AT1G49970          | CLPR1 (ATP-dependent Clp protease proteolytic subunit-related protein 1, chloroplastic); Required for chloroplast development and differentiation                                                                            |
| AT4G32520          | SHM3 (Serine hydroxymethyltransferase 3, chloroplastic); Protein is involved in the pathway tetrahydrofolate interconversion, which is part of One-carbon metabolism                                                         |
| AT1G43670          | FBPase (Fructose-1,6-bisphosphatase, cytosolic)                                                                                                                                                                              |

**Table S2.** Peptide sequences of SOS1 C-terminus (aa446-1146) spotted on Cellulose membrane.

| Spot Number | SOS1 C-term Sequence |
|-------------|----------------------|
| A1          | FVLRLLRMDILPAPK      |
| A2          | RLLRMDILPAPKKRI      |
| A3          | RMDILPAPKKRILEY      |
| A4          | ILPAPKKRILEYTKY      |
| A5          | APKKRILEYTKYEML      |
| A6          | KRILEYTKYEMLNKA      |
| A7          | LEYTKYEMLNKALRA      |
| A8          | TKYEMLNKALRAFQD      |
| A9          | EMLNKALRAFQDLGD      |
| A10         | NKALRAFQDLGDDEE      |
| A11         | LRAFQDLGDDEELGP      |
| A12         | FQDLGDDEELGPADW      |
| A13         | LGDDEELGPADWPTV      |
| A14         | DEELGPADWPTVESY      |
| A15         | LGPADWPTVESYISS      |
| A16         | ADWPTVESYISSLKG      |
| A17         | PTVESYISSLKGSEG      |
| A18         | ESYISSLKGSEGELV      |
| A19         | ISSLKGSEGELVHHP      |
| A20         | LKGSEGELVHHPHNG      |
| A21         | SEGELVHHPHNGSKI      |
| A22         | ELVHHPHNGSKIGSL      |
| A23         | HHPHNGSKIGSLDPK      |

|     |                 |
|-----|-----------------|
| A24 | HNGSKIGSLDPKSLK |
| A25 | SKIGSLDPKSLKDIR |
| A26 | GSLDPKSLKDIRMRF |
| A27 | DPKSLKDIRMRFLNG |
| A28 | SLKDIRMRFLNGVQA |
| A29 | DIRMRFLNGVQATYW |
| A30 | MRFLNGVQATYWEML |
| B1  | LNGVQATYWEMLDEG |
| B2  | VQATYWEMLDEGRIS |
| B3  | TYWEMLDEGRISEVT |
| B4  | EMLDEGRISEVTANI |
| B5  | DEGRISEVTANILMQ |
| B6  | RISEVTANILMQSVD |
| B7  | EVTANILMQSVDEAL |
| B8  | ANILMQSVDEALDQV |
| B9  | LMQSVDEALDQVSTT |
| B10 | SVDEALDQVSTTLCD |
| B11 | EALDQVSTTLCDWRG |
| B12 | DQVSTTLCDWRGLKP |
| B13 | STTLCDWRGLKPHVN |
| B14 | LCDWRGLKPHVNFNP |
| B15 | WRGLKPHVNFNPYYN |
| B16 | LKPHVNFNPYYNFLH |
| B17 | HVNFPNYYNFLHSKV |

|     |                 |
|-----|-----------------|
| B18 | FPNYYNFLHSKVVPR |
| B19 | YYNFLHSKVVPRKLV |
| B20 | FLHSKVVPRKLVTYF |
| B21 | SKVVPRKLVTYFAVE |
| B22 | VPRKLVTYFAVERLE |
| B23 | KLVTYFAVERLESAC |
| B24 | TYFAVERLESACYIS |
| B25 | AVERLESACYISAAF |
| B26 | RLESACYISAAFLRA |
| B27 | SACYISAAFLRAHTI |
| B28 | YISAAFLRAHTIARQ |
| B29 | AAFLRAHTIARQQLY |
| B30 | LRAHTIARQQLYDFL |
| C1  | HTIARQQLYDFLGES |
| C2  | ARQQLYDFLGESNIG |
| C3  | QLYDFLGESNIGSIV |
| C4  | DFLGESNIGSIVINE |
| C5  | GESNIGSIVINESEK |
| C6  | NIGSIVINESEKEGE |
| C7  | SIVINESEKEGEEAK |
| C8  | INESEKEGEEAKKFL |
| C9  | SEKEGEEAKKFLEKV |
| C10 | EGEEAKKFLEKVRSS |
| C11 | EAKKFLEKVRSSFPQ |
| C12 | KFLEKVRSSFPQVLR |
| C13 | EKVRSSFPQVLRVVK |
| C14 | RSSFPQVLRVVKTKQ |
| C15 | FPQVLRVVKTKQVTY |
| C16 | VLRVVKTKQVTVSVL |
| C17 | VVKTKQVTVSVLNHL |

|     |                 |
|-----|-----------------|
| C18 | TKQVTYSVLNHLLGY |
| C19 | VTYSVLNHLLGYIEN |
| C20 | SVLNHLLGYIENLEK |
| C21 | NHLLGYIENLEKVGL |
| C22 | LGYIENLEKVGLLEE |
| C23 | IENLEKVGLLEEKEI |
| C24 | LEKVGLLEEKEIAHL |
| C25 | VGLLEEKEIAHLHDA |
| C26 | LEEKEIAHLHDAVQT |
| C27 | KEIAHLHDAVQTGLK |
| C28 | AHLHDAVQTGLKLL  |
| C29 | HDAVQTGLKLLRNP  |
| C30 | VQTGLKLLRNPPIV  |
| D1  | GLKLLRNPPIVKLP  |
| D2  | KLLRNPPIVKLPKLS |
| D3  | RNPPIVKLPKLSDMI |
| D4  | PIVKLPKLSDMITSH |
| D5  | KLPKLSDMITSHPLS |
| D6  | KLSDMITSHPLSVAL |
| D7  | DMITSHPLSVALPPA |
| D8  | TSHPLSVALPPAFCE |
| D9  | PLSVALPPAFCEPLK |
| D10 | VALPPAFCEPLKHSK |
| D11 | PPAFCEPLKHSKKEP |
| D12 | FCEPLKHSKKEPMKL |
| D13 | PLKHSKKEPMKLRGV |
| D14 | HSKKEPMKLRGVTTY |
| D15 | KEPMKLRGVTTYKEG |
| D16 | MKLRGVTTYKEGSKP |
| D17 | RGVTTYKEGSKPTGV |

|     |                 |
|-----|-----------------|
| D18 | TLYKEGSKPTGVWLI |
| D19 | KEGSKPTGVWLIFDG |
| D20 | SKPTGVWLIFDGIVK |
| D21 | TGVWLIFDGIVKWKS |
| D22 | WLIFDGIVKWKSKIL |
| D23 | FDGIVKWKSKILSNN |
| D24 | IVKWKSKILSNNHSL |
| D25 | WKSKILSNNHSLHPT |
| D26 | KILSNNHSLHPTFSH |
| D27 | SNNHSLHPTFSHGST |
| D28 | HSLHPTFSHGSTLGL |
| D29 | HPTFSHGSTLGLYEV |
| D30 | FSHGSTLGLYEVLTG |
| E1  | GSTLGLYEVLTGKPY |
| E2  | LGLYEVLTGKPYLCD |
| E3  | YEVLTGKPYLCDLIT |
| E4  | LTGKPYLCDLITDSM |
| E5  | KPYLCDLITDSMVL  |
| E6  | LCDLITDSMVLFFI  |
| E7  | LITDSMVLFFIDSE  |
| E8  | DSMVLFFIDSEKIL  |
| E9  | VLCFFIDSEKILSLQ |
| E10 | FFIDSEKILSLQSDS |
| E11 | DSEKILSLQSDSTID |
| E12 | KILSLQSDSTIDDFL |
| E13 | SLQSDSTIDDFLWQE |
| E14 | SDSTIDDFLWQESAL |
| E15 | TIDDFLWQESALVLL |
| E16 | DFLWQESALVLLKLL |
| E17 | WQESALVLLKLLRPQ |

|     |                  |
|-----|------------------|
| E18 | SALVLLKLLRPQIFE  |
| E19 | VLLKLLRPQIFESVA  |
| E20 | KLLRPQIFESVAMQE  |
| E21 | RPQIFESVAMQELRA  |
| E22 | IFESVAMQELRALVS  |
| E23 | SVAMQELRALVSTES  |
| E24 | MQELRALVSTESSKL  |
| E25 | LRALVSTESSKLTTY  |
| E26 | LVSTESSKLTTYVTG  |
| E27 | TESSKLTTYVTGESI  |
| E28 | SKLTTYVTGESIEID  |
| E29 | TTYVTGESIEIDCNS  |
| E30 | VTGESIEIDCNSIGL  |
| F1  | ESIEIDCNSIGLLE   |
| F2  | EIDCNSIGLLEGFV   |
| F3  | CNSIGLLEGFVKPV   |
| F4  | IGLLEGFVKPVGIK   |
| F5  | LLEGFVKPVGIKEEL  |
| F6  | GFVKPVGIKEELISS  |
| F7  | KPVGIKEELISSPAA  |
| F8  | GIKEELISSPAALSP  |
| F9  | EELISSPAALSPSNG  |
| F10 | ISSPAALSPSNGNQS  |
| F11 | PAALSPSNGNQS FHN |
| F12 | LSPSNGNQS FHNSSE |
| F13 | SNGNQS FHNSSEASG |
| F14 | NQS FHNSSEASGIMR |
| F15 | FHNSSEASGIMRVSF  |
| F16 | SSEASGIMRVSF SQ  |
| F17 | ASGIMRVSF SQATQ  |

|     |                 |
|-----|-----------------|
| F18 | IMRVSFQQATQYIV  |
| F19 | VSFSQQATQYIVETR |
| F20 | SQQATQYIVETRARA |
| F21 | ATQYIVETRARAIF  |
| F22 | YIVETRARAIFNIG  |
| F23 | ETRARAIFNIGAFG  |
| F24 | ARAIIFNIGAFGADR |
| F25 | IIFNIGAFGADRTLH |
| F26 | NIGAFGADRTLHRRP |
| F27 | AFGADRTLHRRPSSL |
| F28 | ADRTLHRRPSSLTPP |
| F29 | TLHRRPSSLTPPRSS |
| F30 | RRPSSLTPPRSSSSD |
| G1  | SSLTPPRSSSSDQLQ |
| G2  | TPPRSSSSDQLQRSF |
| G3  | RSSSSDQLQRSFRKE |
| G4  | SSDQLQRSFRKEHRG |
| G5  | QLQRSFRKEHRGLMS |
| G6  | RSFRKEHRGLMSWPE |
| G7  | RKEHRGLMSWPENIY |
| G8  | HRGLMSWPENIYAKQ |
| G9  | LMSWPENIYAKQQQE |
| G10 | WPENIYAKQQQEINK |
| G11 | NIYAKQQQEINKTTL |
| G12 | AKQQQEINKTTLSLS |
| G13 | QQEINKTTLSLSERA |
| G14 | INKTTLSLSERAMQL |
| G15 | TTLSLSERAMQLSIF |
| G16 | LSERAMYQSIFGSM  |
| G17 | ERAMYQSIFGSMVNV |

|     |                  |
|-----|------------------|
| G18 | MYQSIFGSMVNVYRR  |
| G19 | SIFGSMVNVYRRSVS  |
| G20 | GSMVNVYRRSVSFGG  |
| G21 | VNVYRRSVSFGGIYN  |
| G22 | YRRSVSFGGIYNNKL  |
| G23 | SVSFGGIYNNKLQDN  |
| G24 | FGGIYNNKLQDNLLY  |
| G25 | IYNNKLQDNLLYKKL  |
| G26 | NKLQDNLLYKKLPLN  |
| G27 | QDNLLYKKLPLNPAQ  |
| G28 | LLYKKLPLNPAQGLV  |
| G29 | KKLPLNPAQGLVSAK  |
| G30 | PLNPAQGLVSAKSES  |
| H1  | PAQGLVSAKSESSIV  |
| H2  | GLVSAKSESSIVTKK  |
| H3  | SAKSESSIVTKKQLE  |
| H4  | SESSIVTKKQLETRK  |
| H5  | SIVTKKQLETRKHAC  |
| H6  | TKKQLETRKHACQLP  |
| H7  | QLETRKHACQLPLKG  |
| H8  | TRKHACQLPLKGESS  |
| H9  | HACQLPLKGESSTRQ  |
| H10 | QLPLKGESSTRQNTM  |
| H11 | LKGESSTRQNTMVES  |
| H12 | ESSTRQNTMVESSEDE |
| H13 | TRQNTMVESSEDEEDE |
| H14 | NTMVESSEDEEDEDEG |
| H15 | VESSDEEDEDEGIVV  |
| H16 | SDEEDEDEGIVVRID  |
| H17 | EDEDEGIVVRIDSPS  |



|     |                 |
|-----|-----------------|
| H18 | DEGIVVRIDSPSKIV |
| H19 | IVVRIDSPSKIVFRN |
| H20 | VRIDSPSKIVFRNDL |
| H21 | -               |
| H22 | -               |
| H23 | -               |
| H24 | -               |
| H25 | -               |
| H26 | -               |
| H27 | -               |
| H28 | -               |
| H29 | -               |
| H30 | -               |
| I1  | -               |
| I2  | -               |
| I3  | -               |
| I4  | -               |
| I5  | IVTKKQLETRKHACQ |
| I6  | KKQLETRKHACQLPL |
| I7  | LETRKHACQLPLKGE |
| I8  | RKHACQLPLKGESST |
| I9  | ACQLPLKGESSTRQN |

|     |                  |
|-----|------------------|
| I10 | LPLKGESSTRQNTMV  |
| I11 | KGESSTRQNTMVESS  |
| I12 | SSTRQNTMVESSDEE  |
| I13 | RQNTMVESSDEEDED  |
| I14 | TMVESSDEEDEDDEGI |
| I15 | ESSDEEDEDDEGIVVR |
| I16 | DEEDEDDEGIVVRIDS |
| I17 | DEDEGIVVRIDSPDK  |
| I18 | EGIVVRIDSPDKIVF  |
| I19 | VVRIDSPDKIVFRND  |
| I20 | VRIDSPDKIVFRNDL  |
| I21 | -                |
| I22 | -                |
| I23 | -                |
| I24 | -                |
| I25 | -                |
| I26 | -                |
| I27 | -                |
| I28 | -                |
| I29 | -                |
| I30 | -                |

**Table S3.** Oligonucleotides used for the generation of gene constructs and for qRT-PCR

|                       |                                                           |
|-----------------------|-----------------------------------------------------------|
| SOS1_for              | ATGACGACTGTAATCGACGC                                      |
| SOS1_rev              | TCATAGATCGTTCCTGAAAACG                                    |
| SOS1C_EcoRI-Strep_for | TTTGAATTCATGTGGAGCCACCCACAGTTCGAAA<br>AGTTTGTCTACGC       |
| SOS1_Xbal_rev         | TTTTCTAGATCATAGATCGTTCCTGAAAACGATTTTACT                   |
| SOS1C_for-gateway     | GGGGACAAGTTTGTACAAAAAAGCAGGCTTCATGTTTGT<br>CTACGCCTTCTTCG |
| SOS1_rev-gateway      | GGGGACCACTTTGTACAAGAAAGCTGGGTCTAGATCGTTC<br>CTGAAAACG     |
| RTSOS1for             | TTTGGAGCATTGGAGCTGATAG                                    |
| RTSOS1rev             | TTTCTTTCTGATTTGGCTGAAACG                                  |
| RTSOS1-N_for          | TTTGAATTCATGGCGATTTCTTTTTTC                               |
| RTSOS1-N_rev          | TTTGAAGGCGTAGAACAATTGGG                                   |
| PP2a_s                | TAACGTGGCCAAAATGATGC                                      |
| PP2a_as               | GTTCTCCACAACCGCTTGGT                                      |
| WRKY_fwd RT           | GTGAAGATGAAGGGATGTC                                       |
| WRKY_rev RT           | CACAACCTTGAATGTGC                                         |
| FT_fwd RT             | CCCTGCTACAACCTGGAACAAC                                    |
| FT_rev RT             | CACCCTGGTGCATACACTG                                       |
| 14-3-3 $\omega$ _for  | TTTATGGCGTCTGGGCGTGAAG                                    |
| 14-3-3 $\omega$ _rev  | TTTTCACTGCTGTTCTCGGTTCG                                   |
| 14-3-3 $\mu$ _for     | TTTATGTCTTCTGATTCGTCCCGG                                  |
| 14-3-3 $\mu$ _rev     | TTTTCACTGCGAAGGTGGTGGTTG                                  |
| 14-3-3 $\kappa$ _for  | TTTATGGCGACGACCTTAAGCAG                                   |
| 14-3-3 $\kappa$ _rev  | TTTTCAGGCCTCATCCATCTGC                                    |
| 14-3-3 $\lambda$ _for | TTTATGGCGGCGACATTAGGCAG                                   |

|                            |                                                                      |
|----------------------------|----------------------------------------------------------------------|
| 14-3-3λ_rev                | TTTTCAGGCCTCGTCCATCTGC                                               |
| 14-3-3ω_for-gateway        | GGGGACAAGTTTGTACAAAAAAGCAGGCTTCATGGCGTCT<br>GGGCGTGAAG               |
| 14-3-3ω_rev-gateway        | GGGGACCACTTTGTACAAGAAAGCTGGGTCCTGCTGTTC<br>CTCGGTC                   |
| 14-3-3u_for-gateway        | GGGGACAAGTTTGTACAAAAAAGCAGGCTTCATGTCTT<br>CTGATTCGTCCCGGGAAG         |
| 14-3-3u_rev-gateway        | GGGGACCACTTTGTACAAGAAAGCTGGGTCCTGCGAAGGT<br>GGTGGTTG                 |
| 14-3-3k_for-gateway        | GGGGACAAGTTTGTACAAAAAAGCAGGCTTCATGGCGACG<br>ACCTTAAGCAGAGATC         |
| 14-3-3k_rev-gateway        | GGGGACCACTTTGTACAAGAAAGCTGGGTCGGCCTCA<br>TCCATCTGC                   |
| 14-3-3λ_for-gateway        | GGGGACAAGTTTGTACAAAAAAGCAGGCTTCATGGCG<br>GCGACATTAGGCAGAGAC          |
| 14-3-3λ_rev-gateway        | GGGGACCACTTTGTACAAGAAAGCTGGGTCTCAGGCC<br>TCGTCCATCTGCTCCTG           |
| 14-3-3ω_for_pET16b (NdeI)  | TTTCATATGGCGTCTGGGCGTGAAG                                            |
| 14-3-3ω_rev_pET16b (BamHI) | TTTGGATCCTCACTGCTGTTCCCTCG                                           |
| SOS978f                    | GGGGACAAGTTTGTACAAAAAAGCAGGCTCTGATAGGACT<br>CTACATCGAAGACCATCTTCGTTA |
| SOS3'1146                  | GGGGACCACTTTGTACAAGAAAGCTGGGTCCTATCAT<br>AGATCGTTCCTGAAAACGATTTT     |

## Suppl. Information to:

### Materials and Methods

#### Plant material and growth conditions

Wild type and mutant *Arabidopsis* (*Arabidopsis thaliana* (L.) Heynh., ecotype Columbia) plants were grown in a growth chamber at 21°C (day and night), 125  $\mu$ E and short day conditions (10h light, 14h darkness). Plant growth was conducted on either soil, or in hydroponics or in sterile liquid culture. Experiments on soil were performed on standard fertilized soil (ED-73). After 3 weeks of growth under short-day conditions the plants were transferred to a plant chamber with 18 h of light (long-day conditions). Subsequently, soil was watered (tap water) with the same volume of either 150 mM NaCl solution or pure tap water every 3 d for a period of 2 weeks. Plants were grown for an additional 2 weeks before analyses were initiated. Growth in hydroponics was carried out in a nutrient medium as described in [1]. Experiments were performed with 5 week old plants, watered either with or without NaCl. Plant material from shoot and root tissue was used for ion and metabolite quantification and mRNA isolation.

For hydroponic experiments plants were cultivated in sterile liquid culture medium according to [2]. Liquid culture medium was replaced after 7 days with  $\pm$ 100 mM NaCl. Seeds used for sterile culture were surface sterilized in 5% sodium hypochloride and subsequently incubated for 2 d in the dark at 4 °C for stratification. The seedlings were harvested after 10 days and washed twice in deionized water to remove external medium.

Generally, plant tissues were collected and immediately frozen in liquid nitrogen until use. Solute extraction from *Arabidopsis* tissues and spectroscopic quantification of sugars and starch were performed as described earlier [3].

#### Generation of *p35s::SOS1<sup>C-term</sup>StreptII* plants

To create C-term overexpressor mutants the SOS1 amino acid sequence 446 to 1146 was cloned as a Strep-tagII-SOS1 C-terminus fusion construct and introduced into the plant genome via the floral dip method [4]. The Strep-tagII (WSHPQFEK) was introduced with the aim to quantify the recombinant SOS1-C-terminus protein via immuno-detection. It was added by the usage of the following oligonucleotides: SOS1C\_Strep\_for (5'-TTTGAATTCATGTGGAGCCACCCACAGTTCGAAAAGTTTGTCTA CGC-3') and SOS1\_XbaI\_rev (5'-TTTTCTAGATCATAGATCGTTCCTGAAAACGATTTTACT-3'). We excised the mutated sequence by using *EcoRI* and *XbaI* and inserted it into the correspondingly prepared original pHannibal vector [5]. Then, the Strep-tagII-SOS1 C-terminus construct was cut by *NotI* and inserted into the correspondingly prepared original pART27 vector [6]. The fidelity of all constructs was confirmed by complete sequencing. Transformation of the pART27 vector harboring the *p35s::SOS1<sup>C-term</sup>StreptII* construct was performed using *Agrobacterium tumefaciens*, strain GV3101. Positive transformants were isolated by Kanamycin selection.

#### Gene expression analysis

mRNA from *Arabidopsis* was extracted from frozen leaf and root material using the NucleoSpin® RNA Plant Kit (Machery-Nagel, Düren, Germany). Contaminating DNA was removed by DNase digestion. The

iScript™ cDNA Synthesis Kit (Bio-Rad, Munich, Germany) was used for synthesis of cDNA. Quantitative real-time PCR analyses were performed using MyIQ.cycler and IQ SYBR Green supermix (Bio-Rad, Munich, Germany) with the following cycler conditions: 20 min at 50°C, 15 min at 95°C and 50 cycles of 15 s at 95°C, 25 s at 58°C and 40 s at 72°C. Data are calculated using the  $2^{-\Delta\Delta Ct}$  formula [7] and either normalized to the phosphatase subunit *pp2a* (*At1g13320*) or to starting mRNA levels. Gene-specific oligonucleotides used for qRT-PCR are listed in Suppl. Table S3.

### **Interaction studies on AtSOS1-C-terminus using Bimolecular Fluorescence Complementation (BiFC)**

We verified of the interaction between the SOS1-C-terminus and the identified binding partners *in vivo* via the Bimolecular Fluorescence Complementation (BiFC) method. For this purpose we generated YFP<sup>N</sup> and YFP<sup>C</sup> fusion constructs using the GATEWAY™ specific destination vectors pUBC-cYFP-Dest, pUBC-nYFP-Dest, pUBN-cYFP-Dest and pUBN-nYFP-Dest [8]. The cDNA of the gene of interest was amplified by PCR using gene-specific primers harboring the *attB1* and *attB2* sites, then cloned via BP reaction into pDONRZEO (Invitrogen, Darmstadt, Germany) and via LR reaction into the specific destination vector (for primers used see Suppl. Table S3). Purified vector DNAs were introduced into Agrobacterium strain GV3101::PM90 which was subsequently used to transform epidermal cells of *Nicotiana benthamiana*. After an expression period of 3-5 days epidermal cells were analyzed with a Leica TCS SP5II confocal laser scanning microscope system.

### **Metabolite/ion extraction and quantifications**

For isolation of sugars, proline and cations, plant material was ground under liquid N<sub>2</sub>. Subsequently, one ml of deionized water was added to 100 mg tissue, the preparation was thoroughly mixed and kept for 15 min at 95°C. After centrifugation in an Eppendorf centrifuge (10 min, 13.000rpm, 4°C) the supernatant was used for ion chromatography quantifications. Quantification of cations was performed by using a Metrohm 761-IC Compact-System, equipped with a Metrosep-A-Supp1-250-Column (Metrohm, <http://www.metrohm.com>) followed by conductivity quantification at a flow rate of 1 ml min<sup>-1</sup>, using 0.1 N HNO<sub>3</sub> and 1.7 mM dipicolinic acid as the mobile phase. Sugar quantification was performed by high pressure liquid chromatography on a Metrosep CARB1-150 column, using an 871-IC compact device (Metrohm) followed by amperometric quantification. NaOH (0.1 M) in double distilled water was used as the mobile phase with a flow rate of 1 ml min<sup>-1</sup>. For proline quantification the amino acids and standards (20 mM each) were derivatized as described previously [9] using 6- aminoquinolyl-carbamyl (AQC; Watrex, <http://www.watrex.com/>). Measurements of the AQC amino acids were performed using a Dionex P680 HPLC system with an UV170U detector (Dionex, <http://www.dionex.com/>), and a column system consisting of a CC8/4 ND 100–5 C18–ec column and a 250/4 Nucleodur 100–5 C18– ec column (Macherey-Nagel, Düren, Germany). A gradient comprising 100 mM sodium acetate and acetonitrile (0–15%) was used to separate the amino acids. The AQC amino acids were detected by fluorescence with excitation at 250 nm and emission at 395 nm.

### **Heterologous synthesis of AtSOS1 C-terminus (aa978-1146) and At14-3-3 ω**

To generate a N-terminal GST-tag fusion construct, the *AtSOS1* C-terminus(aa978-1146) coding sequence was amplified and inserted into a pDEST™15 plasmid (ThermoFisher Scientific). The pDEST™15 construct containing *AtSOS1* C-terminus (aa978-1146) was transformed into BL21-SI cells. The transformed bacterial cells were grown at 30°C in Luria-Bertani medium without NaCl. At an OD<sub>600</sub> of 0.6 initiation of expression was

induced and cells were harvested 18 h post-induction by centrifugation in an Eppendorf centrifuge (6000rpm, 15 min, 4°C), resuspended in buffer medium (10 mM Tris-HCl, pH 7.4) and immediately frozen in liquid nitrogen. To avoid proteolytic degradation phenylmethane sulphonyl-fluoride (PMSF, 1 mM) and protease inhibitor cocktail (Roche, Penzberg, Germany) was added. Cell lysis was performed using a cell disrupter (Emulsiflex) at 5000-10000PSI. After centrifugation (10000xg, 15 min at 4°C), cell debris was removed and the supernatant was collected for the following purification of the soluble protein.

To generate an N-terminal (10xHis)-tag fusion construct, the *At14-3-3 ω* coding sequence was amplified and inserted into a pET16b plasmid (Novagen). The pET16b construct containing *At14-3-3 ω* was transformed into Rosetta(DE3) cells and transformed cells were grown at 37°C in Terrific Broth medium. At an OD<sub>600</sub> of 0.6 initiation of expression was induced by addition of isopropyl-b-D-thiogalactopyranoside (IPTG, 1 mM). The cells were harvested 4 h post-induction by centrifugation (6000xrpm, 15 min, 4°C), re-suspended in buffer medium (50 mM Na<sub>2</sub>HPO<sub>4</sub>, 300 mM NaCl at pH 8.0) and immediately frozen in liquid N<sub>2</sub>. To avoid proteolytic activity, phenylmethane sulphonyl-fluoride (PMSF, 1 mM) and protease inhibitor cocktail (Roche) was added. Cell lysis was supported by sonication. Via centrifugation (12500 rpm, 20 min, 4°C) cell debris were removed and the supernatant was collected for the following purification of the soluble protein.

#### **Purification of *AtSOS1* C-terminus (aa978-1146) and *At14-3-3 ω***

All purification steps were carried out at 4°C. The supernatant containing the GST-tagged *AtSOS1* C-terminus (aa978-1146) construct was incubated with Glutathione Sepharose (Sigma-Aldrich) for 2 h. The suspension was transferred onto a chromatography column and washed with twice the sample volume with 10 mM PBST (Phosphate-Buffered Saline, 0,05% Tween20 at pH 7.4). Subsequently, recombinant *AtSOS1* C-terminus(aa978-1146) was eluted with 15 ml of elution buffer medium (50 mM Tris-HCl at pH 9.0, 7.5 mM reduced glutathione) and protein concentrations were quantified using the Pierce™ BCA protein assay kit (ThermoFisher Scientific).

The supernatant containing the (10xHis)-labeled *At14-3-3 ω* construct was incubated with NiNTA agarose (Qiagen, Düsseldorf, Germany) for 2 h. The Ni-NTA suspension was transferred onto a chromatography column, washed with 10 volumes of the Ni-NTA agarose bed volume with binding buffer medium (300 mM NaCl, 50 mM Na<sub>2</sub>HPO<sub>4</sub>, pH 8.0, 20 mM imidazole) and afterwards, with 6 column volumes of washing buffer medium (300 mM NaCl, 50 mM Na<sub>2</sub>HPO<sub>4</sub>, pH 8.0, 60 mM imidazole). Subsequently, recombinant *At14-3-3 ω* was eluted with 2 ml of elution buffer (300 mM NaCl, 50 mM Na<sub>2</sub>HPO<sub>4</sub> at pH 8.0, 500 mM imidazole) and resulting protein concentrations were quantified.

#### **Pull-down assay**

The GST-tagged *AtSOS1* C-terminus(aa978-1146) peptide was transferred from elution buffer (50 mM Tris-HCl, pH 9.0, 7.5 mM reduced glutathione) to binding buffer medium (0.1 M MOPS, pH 7.5) by the use of an Amicon® Ultra Centrifugal filter (MerckMillipore, <http://www.merckmillipore.com>) and subsequently coupled to Affi-Gel10 matrix (Bio-Rad, <http://www.bio-rad.com>). Leaves of 5-week-old Arabidopsis plants were grounded in PBS medium, and the resulting extract was filtered prior to centrifugation. The supernatant was flushed over a chromatography column containing Affi-Gel10 affinity media to which the peptide had been coupled. The

column was then flushed successively with binding and washing buffer. Finally, the *AtSOS1* C-terminus (aa978-1146) and interacting proteins were eluted with elution buffer (PBS + 1% SDS), and proteins were precipitated by adding four volumes of ice-cold acetone, followed by centrifugation. The sediment was re-suspended in SDS-PAGE loading medium and proteins were separated by gel-electrophoresis. After Coomassie Brilliant Blue R 250 staining the whole lane was excised and sliced into small horizontal pieces. Gel slices were analyzed by Mass Spectrometry. MS/MS spectra were searched against the Arabidopsis Information Resource (<http://www.arabidopsis.org>) database.

### **SDS-PAGE and immunostaining**

SDS-PAGE was performed and separated proteins were stained with Coomassie Brilliant Blue R 250 or used for immunoblots. Immunodetection was carried out with a monoclonal anti-GST antibody (GE Healthcare, <http://www.gehealthcare.com>) in combination with a secondary horseradish peroxidase (HRP) anti-mouse IgG (<http://www.sigmaaldrich.com>). The apparent protein masses were estimated with Page Ruler™ Prestained Protein Ladder (ThermoFisher Scientific).

### **Dot blot-analyses**

Detection of the recombinant, Strep-tagged *SOS1* C-terminus protein in *p35s::SOS1<sup>c-term</sup>StreptII* plants, was carried out using salt-stressed Arabidopsis root tissues. For this purpose, Arabidopsis Wt- and *p35s::SOS1<sup>c-term</sup>StreptII* plants were cultivated in hydroponic culture for two weeks prior to exposure to 200 mM NaCl for 5 days. Collected plant material was ground under liquid N<sub>2</sub>. Subsequently, 300 µl of 50 mM HEPES buffer, pH 7.6 (KOH) containing 1.5 mM PMSF was added to 300 mg tissue and the preparation was thoroughly mixed. After centrifugation in an Eppendorf centrifuge (10 min, 13000rpm, 4°C) the supernatant was transferred into a new reaction tube. In order to increase the protein concentration, an acetone precipitation was performed over night at -20°C. To this end, 4 volumes of cold acetone were added to 1 volume of sample. The obtained protein pellet was washed twice with 500 µl cold acetone the next day and re-suspended in 30 µl transparent SDS loading dye. After determination of the protein concentration, the precipitated samples were dropped on a cellulose membrane. Immunodetection was carried out with a monoclonal anti-Strep-Tag® antibody in combination with a secondary horseradish peroxidase (HRP) anti-mouse IgG. The apparent protein masses were estimated with Page Ruler™ Prestained Protein Ladder (ThermoFisher Scientific). As a loading control, the blot was stained with Ponceau-S solution prior to immunoprinting.

### **Peptide-spot binding assay**

15 amino acid long peptides, which cover the wild-type sequence of *SOS1*-C-terminus with an overlap of 12 aa were synthesized and immobilized on a cellulose membrane, derivatized with a polyethylene glycol spacer as described [10]. Membranes were activated in methanol for 4 min and then equilibrated in binding buffer (0.2 mM MOPS, 10 mM NaCl at pH 7.4) for 10 min. (10xHis)-labeled *At14-3-3 ω* was added and incubated at 4°C overnight. The membrane was blocked with TBS+2% milk powder and incubated with an anti-poly-Histidine antibody for 2 h, followed by incubation with the second anti-mouse antibody. The membrane was washed with TBS buffer three times for 10 min each, treated with ECL™, and subjected to luminescence imaging using an Odyssey® Fc Imaging System (LI-COR Biosciences, USA).

## References

1. Conn, S.; Gilliam, M. Comparative physiology of elemental distributions in plants. *Ann. Bot.* **2010**, *105*, 1081-1102
2. Scheible, W.R.; Morcuende, R.; Czechowski, T.; Fritz, C.; Osuna, D.; Palacios-Rojas, N.; Schindelasch, D.; Thimm, O.; Udvardi, M.K.; Stitt, M. Genome-wide reprogramming of primary and secondary metabolism, protein synthesis, cellular growth processes, and the regulatory infrastructure of Arabidopsis in response to nitrogen. *Plant Physiol.* **2004**, *136*, 2483-2499.
3. Quick, W.P.; Neuhaus, H.E.; Feil, R.; Stitt, M. Fluoride leads to an increase of inorganic pyrophosphate and an inhibition of photosynthetic sucrose synthesis in spinach leaves. *Biochim. Biophys. Acta* **1989**, *973*, 263-271.
4. Clough, S.J.; Bent, A.F. Floral dip: a simplified method for Agrobacterium-mediated transformation of *Arabidopsis thaliana*. *Plant J.* **1998**, *16*, 735-743.
5. Wesley, S.V.; Helliwell, C.A.; Smith, S.A.; Wang, N.B.; Rouse, D.T.; Liu, Q.; Gooding, P.S.; Sing, S.P.; Abbott, P.; Stoutjesdijk, P.A., et al. Construct design for efficient, effective and high-throughput gene silencing in plants. *Plant J.* **2001**, *27*, 581-590.
6. Gleave, A.P. A versatile binary vector system with a T-DNA organisational structure conducive to efficient integration of cloned DNA into the plant genome. *Plant Mol. Biol.* **1992**, *20*, 1203-1210.
7. Livak, K.J.; Schmittgen, T.D. Analysis of relative gene expression data using real-time quantitative PCR and the  $2^{-\Delta\Delta CT}$  method. *Methods* **2001**, *25*, 402-408.
8. Grefen, C.; Chen, Z.; Honsbein, A.; Donald, N.; Hills, A.; Blatt M.R.. A novel motif essential for SNARE interaction with the  $K^{(+)}$  channel KC1 and channel gating in Arabidopsis. *Plant Cell* **2010**, *22*, 3076-3092.
9. Rolletschek, H.; Hajirezaei, M.R.; Wobus, U.; Weber, H. Antisense-inhibition of ADP-glucose pyrophosphorylase in *Vicia narbonensis* seeds increases soluble sugars and leads to higher water and nitrogen uptake. *Planta* **2002**, *214*, 954-964.
10. Hilpert, K.; Winklere, D.F.; Hancock, R.E. Peptide arrays on cellulose support: SPOT synthesis, a time and cost efficient method for synthesis of large numbers of peptides in a parallel and addressable fashion. *Nat. Protoc.* **2007**, *2*, 1333-1349
